# Supplementary material for: Turbulence is ineffective in causing raindrop growth in polluted clouds
Source: Research Square preprint supplement (doi:10.21203/rs.3.rs-8520516/v1), 2026-01-08
Supplement: Supplementary file 2 [file 961c9795b3f93279221be43f.docx]

**Methods**

**Experimental conditions**

Experiments were conducted in a closed, fan-driven turbulence chamber1-2, where homogeneous and isotropic turbulence is generated at the centre (Extended Data Fig. 1). Different levels of turbulence can be achieved by varying the speed of the fans (Extended Data Fig. 2). Droplets were generated using ultrasonic microporous atomizers, which consist of a stainless-steel plate perforated with micron-sized orifices driven by a piezoceramic ring3-4. When supplied with water and actuated at the resonant frequency, the vibrating plate produces uniform droplets whose diameters are determined primarily by the orifice size. We employed atomizers with nominal orifice diameters of 5 µm, 9 µm, and 15 µm to generate distinct droplet size distributions representative of polluted, relatively clean, and pristine conditions, respectively (Extended Data Fig. 3). Arrays of identical atomizers were operated to achieve the required droplet number densities. Input power and water flow rates were held constant across all turbulence conditions, and the atomizers were run continuously to maintain statistical stationarity.

The droplet volume fraction maintained in the turbulence chamber for all experiments was or lower, thus the modulation of turbulence due to the droplets can be neglected. The Froude number (), defined as the ratio between acceleration caused by turbulent flow and that of gravity3, estimates the relative significance of gravity and turbulence. For all the experimental conditions is greater than 10, indicating that gravitational effects on droplet collisions are negligible compared with turbulence5. This effective decoupling of gravitational influences from turbulent dynamics highlights the uniqueness of this study.

**PDPA measurements**

Droplet diameters and one component of the velocity were measured using a Phase Doppler Particle Analyzer6 (PDPA; TSI Instruments) (Extended Data Fig. 4). The system employed two intersecting laser beams at 532 nm, with the receiving optics positioned at a 33° off-axis scattering angle. The system can measure droplet sizes in the range of 0.5 - 180μm with an uncertainty of ± 0.5μm. Only droplets with sufficient signal-to-noise ratio and validated phase bursts were accepted. Diameter and velocity measurements were recorded in coincidence, and manufacturer-provided signal-validation routines (including intensity and diameter‐difference checks) were applied in real time. Across all experimental conditions, the validation rate remained high (≈ 90%), ensuring robust statistics.

**Imaging and optical configuration**

High-resolution images of the droplet field were acquired with a high-speed CMOS camera operated at 1 KHz with resolution 1280 x 1024, coupled with a 100 mm macro-lens with f/2 aperture (Extended Data Fig. 4). The camera was positioned normal to the sheet, yielding a field of view of 30 mm x 23.5 mm. This spatial calibration was performed using a precision target. Laser beam from Nd:YLF laser with a wavelength 527 nm and 25 mJ per pulse was used as the light source. A laser sheet of thickness 1 mm is created using a beam collimator and a combination of a 25 mm plano-concave cylindrical lens and a 600 mm spherical plano-convex lens mounted on a light sheet optics.

**Experimental procedure**

Experiments were performed at turbulence levels greater than to thoroughly mix the droplets throughout the chamber and to minimize the effect of the atomizers on the turbulence in the region of measurement. For every droplet size distribution, an identical set of twelve turbulence conditions was selected, with values ranging from 136 to 207. Each experiment followed an identical sequence. The fans were first set to the target rotation rate and allowed to stabilize. Atomizers were then switched on, and the droplets were allowed to equilibrate for 30 s. A steady-state cloud-like condition is achieved where the constant rate of droplets injected by the atomizers is balanced by the droplet growth by collision and coalescence due to turbulence, and droplets are lost by hitting the walls and by settling. Throughout the duration of the experiment, both the turbulence properties and the atomizer operational settings were kept constant. After reaching steady-state conditions, both imaging and PDPA measurements were acquired consecutively. For each turbulence level, five independent realisations were performed, and in each realization, 10000 PDPA measurements and 2000 images were acquired.

**Environmental monitoring and ancillary measurements**

Temperature, relative humidity, and laser power were continuously monitored throughout all experiments. Chamber temperature and humidity were measured using a Vaisala HMP 7 probe and remained stable throughout, with values of approximately () and 95 % (± 1%) relative humidity. The entire setup was housed inside a temperature-humidity-controlled laboratory where the temperature and relative humidity of () and 50 % (± 5%) were maintained respectively.

Fogging of windows posed a significant challenge while performing long-duration experiments. To mitigate this issue, the windows were coated with a transparent superhydrophobic material, the Glaco MirrorCoat Zero purchased from Soft99 Co.7. Also, externally heated hot air at was constantly impinged on the outer surface of the windows to gently heat and maintain their surface temperature slightly above the dew point, thereby preventing condensation. This heating was very mild and did not affect the air temperatures inside the experimental setup.

**Image Processing:**

The acquired images were processed using in-house codes based on MATLAB®. The images were binarized using an optimum intensity threshold. The droplet number density was estimated by counting the number of droplets within the illumination volume. From the images, the radial distribution function 8 is calculated by binning the particle pairs at different separation distances , based on the below formula,

here, represents the number of droplet pairs found in the annular area at a distance with a separation , where is the total number of droplet pairs in the image with viewing area . Periodic boundaries we assumed while calculating , where the particle field is mirrored across the image boundaries1,9. We examined the effect of thresholding on the trend of by varying the threshold value by ± 20% of the selected threshold value and found the results to be qualitatively similar. The code used for image processing is available at <https://doi.org/10.6084/m9.figshare.30788024>.

**References:**

1. Salazar, J. P. et al. Experimental and numerical investigation of inertial particle clustering in isotropic turbulence. *J. Fluid Mech.* **600**, 245–256 (2008).
2. Dou, Z. et al. PIV measurement of high-Reynolds-number homogeneous and isotropic turbulence in an enclosed flow apparatus with fan agitation. *Meas. Sci. Technol.* **27**, 035305 (2016).
3. Chen, H. et al. Experimental study on optimal spray parameters of piezoelectric atomizer based spray cooling. *Int. J. Heat Mass Transf.* **103**, 57–65 (2016).
4. Hou, Y. et al. Recent trends in structures and applications of valveless piezoelectric pump—a review. *J. Micromech. Microeng.* **32**, 053002 (2022).
5. Bec, J., Homann, H. & Ray, S. S. Gravity-driven enhancement of heavy particle clustering in turbulent flow. *Phys. Rev. Lett.* **112**, 184501 (2014).
6. Albrecht, H. E., Damaschke, N., Borys, M. & Tropea, C. Laser Doppler and Phase Doppler Measurement Techniques. (*Springer*, Berlin, 2013).
7. Bourrianne, P., Lv, C. & Quéré, D. The cold Leidenfrost regime. *Sci. Adv.* **5**, eaaw0304 (2019).
8. Sundaram, S. & Collins, L. R. Collision statistics in an isotropic particle-laden turbulent suspension. Part 1. Direct numerical simulations. *J. Fluid Mech*. **335**, 75–109 (1997).
9. De Jong, J. et al. Measurement of inertial particle clustering and relative velocity statistics in isotropic turbulence using holographic imaging. *Int. J. Multiphase Flow* **36**, 324–332 (2010).
